# Supplementary material
Source: PubMed Central journal article supplement (PMC3497537)

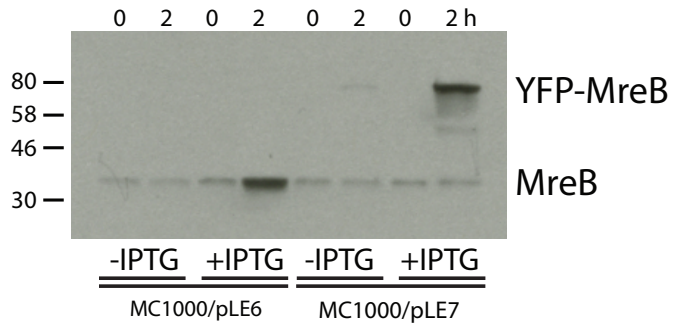

Supplement: JB.00505-12_zjb999092006so3.pdf [file JB.00505-12_zjb999092006so3.pdf]
